# Supplementary material for: Comparable stabilisation, structural changes and activities can be induced in FGF by a variety of HS and non-GAG analogues: implications for sequence-activity relationships
Source: Royal Society of Chemistry journal article supplement (doi:10.1039/c0ob00246a), 2010-01-01
Supplement: c0ob00246a.pdf [file c0ob00246a.pdf]

## Organic & Biomolecular Chemistry

### Comparable stabilisation, structural changes and activities can be induced in FGF by a variety of HS and non-GAG analogues: Implications for sequence-activity relationships

Timothy R. Rudd, Katarzyna A. Uniewicz, Alessandro Ori, Scott E. Guimond, Mark A. Skidmore, Davide Gaudesi, Ruoyan Xu, Jeremy E. Turnbull, Marco Guerrini, Giangiacomo Torri, Guiliano Siligardi, Mark Wilkinson, David G. Fernig and Edwin A. Yates

#### Supplementary

#### PCA data

**Supplementary Table 1** Systematically modified heparins studied by  $^{13}\text{C}$  NMR and analysed using principal component analysis.

| Notation                                                    | H-        | Position of Substitution     |                              |                              |
|-------------------------------------------------------------|-----------|------------------------------|------------------------------|------------------------------|
|                                                             |           | I2 / R <sub>1</sub>          | A6 / R <sub>2</sub>          | A2 / R <sub>3</sub>          |
| I <sub>2OH</sub> A <sup>6OH</sup> <sub>NH<sub>2</sub></sub> | <b>1</b>  | H                            | H                            | H                            |
| I <sub>2OH</sub> A <sup>6OH</sup> <sub>NS</sub>             | <b>2</b>  | H                            | H                            | SO <sub>3</sub> <sup>-</sup> |
| I <sub>2OH</sub> A <sup>6S</sup> <sub>NS</sub>              | <b>3</b>  | H                            | SO <sub>3</sub> <sup>-</sup> | SO <sub>3</sub> <sup>-</sup> |
| I <sub>2S</sub> A <sup>6S</sup> <sub>NH<sub>2</sub></sub>   | <b>4</b>  | SO <sub>3</sub> <sup>-</sup> | SO <sub>3</sub> <sup>-</sup> | H                            |
| I <sub>2S</sub> A <sup>6S</sup> <sub>NAC</sub>              | <b>5</b>  | SO <sub>3</sub> <sup>-</sup> | SO <sub>3</sub> <sup>-</sup> | COCH <sub>3</sub>            |
| I <sub>2S</sub> A <sup>6OH</sup> <sub>NS</sub>              | <b>6</b>  | SO <sub>3</sub> <sup>-</sup> | H                            | SO <sub>3</sub> <sup>-</sup> |
| I <sub>2OH</sub> A <sup>6S</sup> <sub>NH<sub>2</sub></sub>  | <b>7</b>  | H                            | SO <sub>3</sub> <sup>-</sup> | H                            |
| I <sub>2OH</sub> A <sup>6S</sup> <sub>NAC</sub>             | <b>8</b>  | H                            | SO <sub>3</sub> <sup>-</sup> | COCH <sub>3</sub>            |
| I <sub>2OH</sub> A <sup>6OH</sup> <sub>NAC</sub>            | <b>9</b>  | H                            | H                            | COCH <sub>3</sub>            |
| I <sub>2S</sub> A <sup>6OH</sup> <sub>NH<sub>2</sub></sub>  | <b>10</b> | SO <sub>3</sub> <sup>-</sup> | H                            | H                            |
| I <sub>2S</sub> A <sup>6OH</sup> <sub>NAC</sub>             | <b>11</b> | SO <sub>3</sub> <sup>-</sup> | H                            | COCH <sub>3</sub>            |
| I <sub>2S</sub> A <sup>6S</sup> <sub>NS</sub>               | <b>12</b> | SO <sub>3</sub> <sup>-</sup> | SO <sub>3</sub> <sup>-</sup> | SO <sub>3</sub> <sup>-</sup> |

I-N refers to the N<sup>th</sup> position of iduronate and A-N to the N<sup>th</sup> position of glucosamine (aminosugar) residues respectively.

**Supplementary Table 2**  $^{13}\text{C}$  chemical Shift assignments (ppm) for 12 chemically modified heparins

|           | H1    | H2    | H3    | H4    | H5    | H6    | H7    | H8    | H9    | H10   | H11   | H12   |
|-----------|-------|-------|-------|-------|-------|-------|-------|-------|-------|-------|-------|-------|
| <b>A1</b> | 95.8  | 98.2  | 98.1  | 93.7  | 96.6  | 100.0 | 97.9  | 97.1  | 97.1  | 97.2  | 96.8  | 99.5  |
| <b>A2</b> | 57.0  | 60.5  | 60.3  | 57.1  | 56.2  | 60.8  | 57.6  | 56.2  | 56.2  | 58.0  | 56.6  | 60.7  |
| <b>A3</b> | 71.8  | 72.5  | 72.4  | 70.9  | 73.0  | 72.4  | 73.9  | 72.5  | 72.3  | 73.5  | 72.9  | 72.5  |
| <b>A4</b> | 79.0  | 80.2  | 80.1  | 78.2  | 79.3  | 80.5  | 79.6  | 79.6  | 79.6  | 80.1  | 80.6  | 78.8  |
| <b>A5</b> | 74.3  | 73.5  | 71.5  | 72.0  | 72.3  | 73.8  | 72.7  | 71.8  | 73.7  | 74.2  | 74.2  | 72.0  |
| <b>A6</b> | 61.9  | 62.4  | 68.7  | 68.8  | 69.6  | 62.6  | 69.0  | 68.8  | 62.3  | 62.8  | 62.9  | 69.2  |
| <b>I1</b> | 104.5 | 104.3 | 104.6 | 101.3 | 102.2 | 102   | 104.8 | 104.6 | 104.3 | 101.9 | 102.3 | 102.1 |
| <b>I2</b> | 71.7  | 72.2  | 71.1  | 75.3  | 76.8  | 77.6  | 72.9  | 72.0  | 72.5  | 76.0  | 76.6  | 78.9  |
| <b>I3</b> | 71.8  | 71.5  | 70.4  | 65.4  | 67.3  | 70.7  | 72.4  | 71.4  | 72.2  | 67.0  | 67.1  | 72.1  |
| <b>I4</b> | 77.4  | 77.8  | 77.2  | 73.0  | 74.2  | 78.7  | 77.8  | 77.0  | 77.1  | 74.4  | 74.1  | 79.0  |
| <b>I5</b> | 71.8  | 72.2  | 71.2  | 69.8  | 70.8  | 71.4  | 72.8  | 71.9  | 72.6  | 70.1  | 70.6  | 72.3  |

**Supplementary Table 3** Loadings derived from the principal component analysis of  $^{13}\text{C}$  chemical shift values

| <b>Position</b> | <b>Component 1/I2</b><br>(Proportion of variance 38.8%) | <b>Component 2/A2</b><br>(Proportion of variance 22.3%) | <b>Component 3/A6</b><br>(Proportion of variance 18.5%) |
|-----------------|---------------------------------------------------------|---------------------------------------------------------|---------------------------------------------------------|
| <b>A1</b>       | 0.047                                                   | 0.867                                                   | 0.043                                                   |
| <b>A2</b>       | -0.162                                                  | 0.863                                                   | 0.013                                                   |
| <b>A3</b>       | 0.073                                                   | 0.058                                                   | -0.030                                                  |
| <b>A4</b>       | 0.015                                                   | 0.192                                                   | 0.512                                                   |
| <b>A5</b>       | -0.048                                                  | -0.064                                                  | 0.943                                                   |
| <b>A6</b>       | -0.058                                                  | -0.059                                                  | -0.993                                                  |
| <b>I1</b>       | 0.975                                                   | 0.018                                                   | -0.008                                                  |
| <b>I2</b>       | -0.859                                                  | 0.275                                                   | -0.056                                                  |
| <b>I3</b>       | 0.771                                                   | 0.603                                                   | 0.008                                                   |
| <b>I4</b>       | 0.523                                                   | 0.839                                                   | 0.0160                                                  |
| <b>I5</b>       | 0.765                                                   | 0.502                                                   | -0.058                                                  |

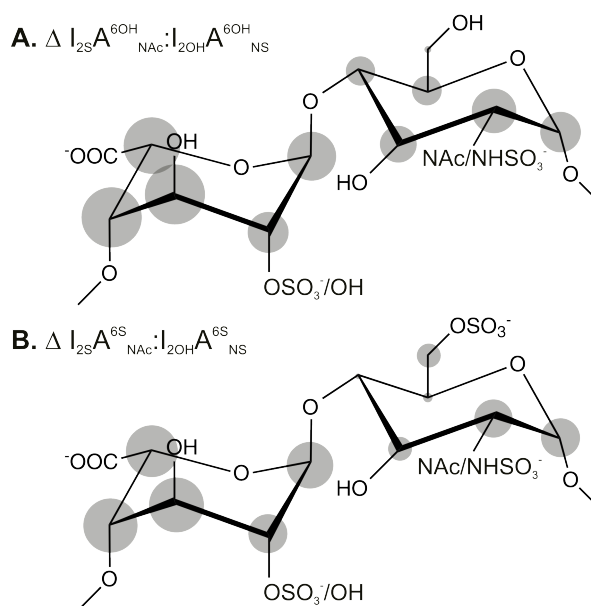

A schematic of the effect of "transferring" an O-sulfate from iduronate to glucoamine (position-2) for 6-de-O-sulfated (A) and 6-O-sulfated (B) polysaccharides.

## DSF data

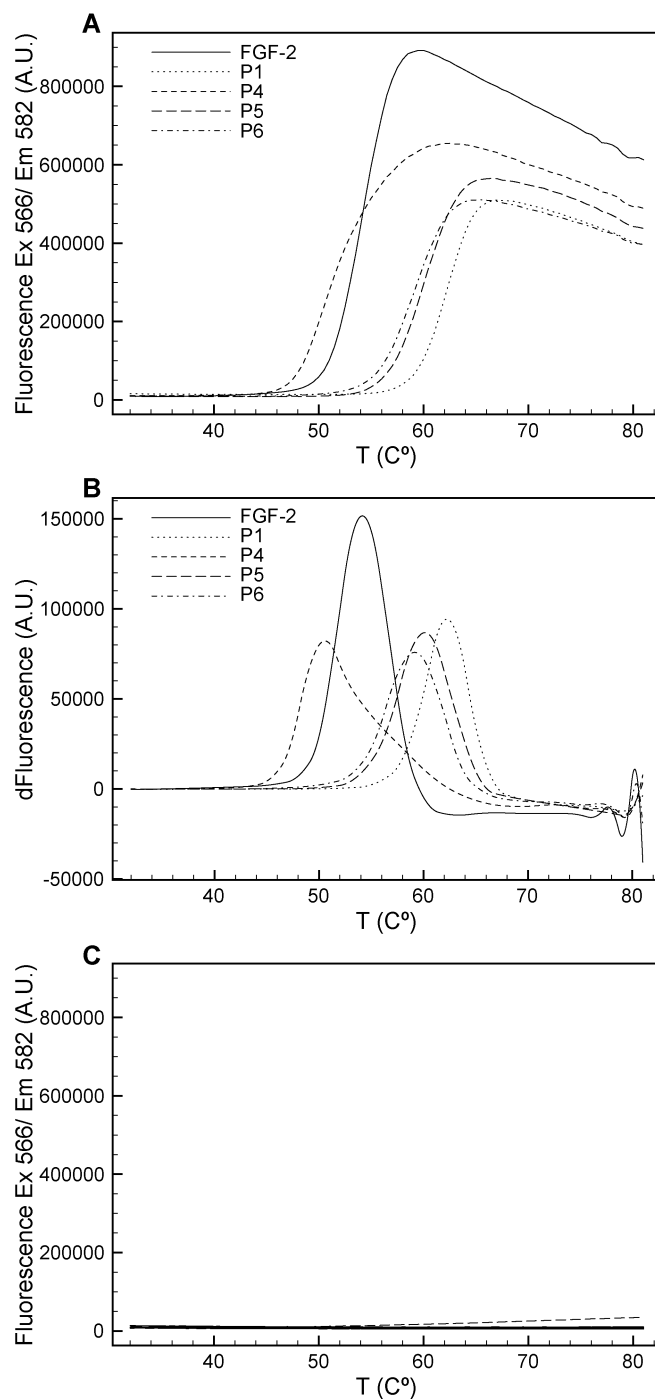

**Supplementary Figure 1.** The principle of DSF data analysis in the presence of illustrative plant polysaccharides and visualisation of background signal of Sypro Orange. **A.** Melting curve profile of 10  $\mu$ M FGF-2 in the presence of selected plant polysaccharides (**P1**, **P4**, **P5** and **P6**) obtained as described in the Methods section. **B.** The first derivatives of each melting curve from the panel **A**, where each maximum of the first derivative indicates the  $T_m$  (melting temperature) of the protein-polysaccharide complex. **C.** Thermal profile of all the plant polysaccharides used in this study incubated with Sypro Orange. The abscissa scale has been adjusted to that of panel **A** for comparison.

These data preclude the possibility that the fluorescence reading was affected by the interaction of the dye with the polysaccharides.

**Supplementary Table 4.** For each set of compounds (heparin derivatives (D1-D9) and chemically sulfated plant polysaccharides (P1-P11)), the melting temperatures of the polysaccharide-FGF complexes, recorded in triplicate, are presented. The calculation of normalised values ( $T_{norm}$ ) and relative complex stabilities was performed as described in Methods.

| <i>FGF1</i> | <i>T<sub>m1</sub></i> | <i>T<sub>m2</sub></i> | <i>T<sub>m3</sub></i> | <i>Mean</i> | <i>SDEV</i> | <i>T<sub>norm</sub></i> | $\neq$ | <i>Relative complex stability</i> | $\neq$ |
|-------------|-----------------------|-----------------------|-----------------------|-------------|-------------|-------------------------|--------|-----------------------------------|--------|
| <b>PBS</b>  | 48.60                 | 48.41                 | 48.51                 | 48.51       | 0.10        | 0.00                    | 0.16   | 0.00                              | 0.01   |
| <b>HEP</b>  | 62.30                 | 62.30                 | 62.18                 | 62.26       | 0.07        | 13.75                   | 0.14   | 1.00                              | 0.01   |
| <b>D2</b>   | 52.42                 | 52.22                 | 52.57                 | 52.40       | 0.18        | 3.90                    | 0.22   | 0.28                              | 0.02   |
| <b>D3</b>   | 48.58                 | 48.73                 | 48.75                 | 48.68       | 0.09        | 0.18                    | 0.15   | 0.01                              | 0.01   |
| <b>D4</b>   | 56.15                 | 56.13                 | 56.58                 | 56.28       | 0.25        | 7.78                    | 0.28   | 0.57                              | 0.02   |
| <b>D5</b>   | 49.10                 | 48.82                 | 48.83                 | 48.92       | 0.16        | 0.41                    | 0.20   | 0.03                              | 0.01   |
| <b>D6</b>   | 48.22                 | 48.05                 | 48.22                 | 48.16       | 0.10        | -0.34                   | 0.16   | -0.02                             | 0.01   |
| <b>D7</b>   | 50.95                 | 50.87                 | 51.20                 | 51.01       | 0.17        | 2.50                    | 0.21   | 0.18                              | 0.02   |
| <b>D8</b>   | 47.84                 | 47.95                 | 47.70                 | 47.83       | 0.13        | -0.68                   | 0.17   | -0.05                             | 0.01   |
| <b>D9</b>   | 61.39                 | 61.36                 | 61.76                 | 61.51       | 0.22        | 13.00                   | 0.25   | 0.95                              | 0.02   |

| <i>FGF2</i> | <i>T<sub>m1</sub></i> | <i>T<sub>m2</sub></i> | <i>T<sub>m3</sub></i> | <i>Mean</i> | <i>SDEV</i> | <i>T<sub>norm</sub></i> | $\neq$ | <i>Relative complex stability</i> | $\neq$ |
|-------------|-----------------------|-----------------------|-----------------------|-------------|-------------|-------------------------|--------|-----------------------------------|--------|
| <b>PBS</b>  | 54.41                 | 54.26                 | 54.25                 | 54.31       | 0.09        | 0.00                    | 0.17   | 0.00                              | 0.01   |
| <b>HEP</b>  | 75.02                 | 74.92                 | 74.80                 | 74.91       | 0.11        | 20.61                   | 0.18   | 1.00                              | 0.01   |
| <b>D2</b>   | 58.79                 | 59.02                 | 59.41                 | 59.07       | 0.31        | 4.76                    | 0.34   | 0.23                              | 0.02   |
| <b>D3</b>   | 53.78                 | 53.82                 | 53.77                 | 53.79       | 0.03        | -0.51                   | 0.14   | -0.02                             | 0.01   |
| <b>D4</b>   | 66.02                 | 66.46                 | 65.95                 | 66.14       | 0.28        | 11.84                   | 0.31   | 0.57                              | 0.02   |
| <b>D5</b>   | 54.58                 | 54.51                 | 55.23                 | 54.77       | 0.40        | 0.47                    | 0.42   | 0.02                              | 0.02   |
| <b>D6</b>   | 54.19                 | 54.26                 | 54.14                 | 54.20       | 0.06        | -0.11                   | 0.15   | -0.01                             | 0.01   |
| <b>D7</b>   | 57.62                 | 57.44                 | 57.80                 | 57.62       | 0.18        | 3.32                    | 0.23   | 0.16                              | 0.01   |
| <b>D8</b>   | 54.46                 | 54.37                 | 54.14                 | 54.32       | 0.17        | 0.02                    | 0.22   | 0.00                              | 0.01   |
| <b>D9</b>   | 73.97                 | 74.14                 | 73.91                 | 74.00       | 0.12        | 19.70                   | 0.18   | 0.96                              | 0.01   |

| <i>FGF1</i> | <i>T<sub>m1</sub></i> | <i>T<sub>m2</sub></i> | <i>T<sub>m3</sub></i> | <i>Mean</i> | <i>SDEV</i> | <i>T<sub>norm</sub></i> | $\neq$ | <i>Relative complex stability</i> | $\neq$ |
|-------------|-----------------------|-----------------------|-----------------------|-------------|-------------|-------------------------|--------|-----------------------------------|--------|
| <b>PBS</b>  | 48.00                 | 47.85                 | 47.88                 | 47.91       | 0.08        | 0.00                    | 0.22   | 0.00                              | 0.02   |
| <b>HEP</b>  | 62.04                 | 62.31                 | 62.40                 | 62.25       | 0.19        | 14.34                   | 0.28   | 1.00                              | 0.02   |
| <b>P1</b>   | 62.99                 | 62.65                 | 62.89                 | 62.85       | 0.18        | 14.94                   | 0.27   | 1.04                              | 0.02   |
| <b>P2</b>   | 45.11                 | 45.13                 | 45.33                 | 45.19       | 0.12        | -2.72                   | 0.24   | -0.19                             | 0.02   |
| <b>P3</b>   | 47.66                 | 47.75                 | 47.83                 | 47.75       | 0.09        | -0.16                   | 0.22   | -0.01                             | 0.02   |
| <b>P4</b>   | 54.30                 | 53.17                 | 53.61                 | 53.69       | 0.57        | 5.78                    | 0.60   | 0.40                              | 0.04   |
| <b>P5</b>   | 62.77                 | 62.60                 | 62.63                 | 62.67       | 0.09        | 14.76                   | 0.23   | 1.03                              | 0.02   |
| <b>P6</b>   | 59.66                 | 60.00                 | 60.25                 | 59.97       | 0.30        | 12.06                   | 0.36   | 0.84                              | 0.03   |
| <b>P7</b>   | 59.86                 | 59.66                 | 60.42                 | 59.98       | 0.39        | 12.07                   | 0.44   | 0.84                              | 0.03   |
| <b>P8</b>   | 61.01                 | 60.71                 | 60.84                 | 60.85       | 0.15        | 12.94                   | 0.25   | 0.90                              | 0.02   |
| <b>P9</b>   | 63.43                 | 63.73                 | 63.75                 | 63.64       | 0.18        | 15.73                   | 0.27   | 1.10                              | 0.02   |
| <b>P10</b>  | 47.88                 | 47.85                 | 47.61                 | 47.78       | 0.15        | -0.13                   | 0.25   | -0.01                             | 0.02   |
| <b>P11</b>  | 60.15                 | 60.18                 | 60.32                 | 60.22       | 0.09        | 12.31                   | 0.23   | 0.86                              | 0.02   |

| <i>FGF2</i> | <i>Tm1</i> | <i>Tm2</i> | <i>Tm3</i> | <i>Mean</i> | <i>SDEV</i> | <i>Tnorm</i> | $\neq$ | <i>Relative complex stability</i> | $\neq$ |
|-------------|------------|------------|------------|-------------|-------------|--------------|--------|-----------------------------------|--------|
| <b>PBS</b>  | 54.72      | 54.70      | 54.48      | 54.64       | 0.13        | 0.00         | 0.23   | 0.00                              | 0.01   |
| <b>HEP</b>  | 77.75      | 77.55      | 77.79      | 77.70       | 0.13        | 23.06        | 0.23   | 1.00                              | 0.01   |
| <b>P1</b>   | 72.10      | 72.03      | 72.12      | 72.08       | 0.05        | 17.45        | 0.19   | 0.76                              | 0.01   |
| <b>P2</b>   | 52.28      | 52.14      | 52.16      | 52.19       | 0.07        | -2.44        | 0.20   | -0.11                             | 0.01   |
| <b>P3</b>   | 54.65      | 54.28      | 54.31      | 54.41       | 0.21        | -0.22        | 0.28   | -0.01                             | 0.01   |
| <b>P4</b>   | 55.29      | 55.07      | 55.02      | 55.13       | 0.14        | 0.49         | 0.23   | 0.02                              | 0.01   |
| <b>P5</b>   | 69.65      | 69.68      | 69.48      | 69.60       | 0.11        | 14.97        | 0.22   | 0.65                              | 0.01   |
| <b>P6</b>   | 64.19      | 63.55      | 63.52      | 63.75       | 0.38        | 9.12         | 0.42   | 0.40                              | 0.02   |
| <b>P7</b>   | 69.88      | 69.67      | 69.51      | 69.69       | 0.19        | 15.05        | 0.26   | 0.65                              | 0.01   |
| <b>P8</b>   | 59.01      | 58.51      | 58.48      | 58.66       | 0.30        | 4.03         | 0.35   | 0.17                              | 0.02   |
| <b>P9</b>   | 69.80      | 70.03      | 69.67      | 69.84       | 0.18        | 15.20        | 0.26   | 0.66                              | 0.01   |
| <b>P10</b>  | 54.80      | 54.15      | 54.58      | 54.51       | 0.33        | -0.13        | 0.38   | -0.01                             | 0.02   |
| <b>P11</b>  | 71.85      | 71.46      | 71.01      | 71.44       | 0.42        | 16.81        | 0.46   | 0.73                              | 0.02   |

### BaF3 Cell assay data

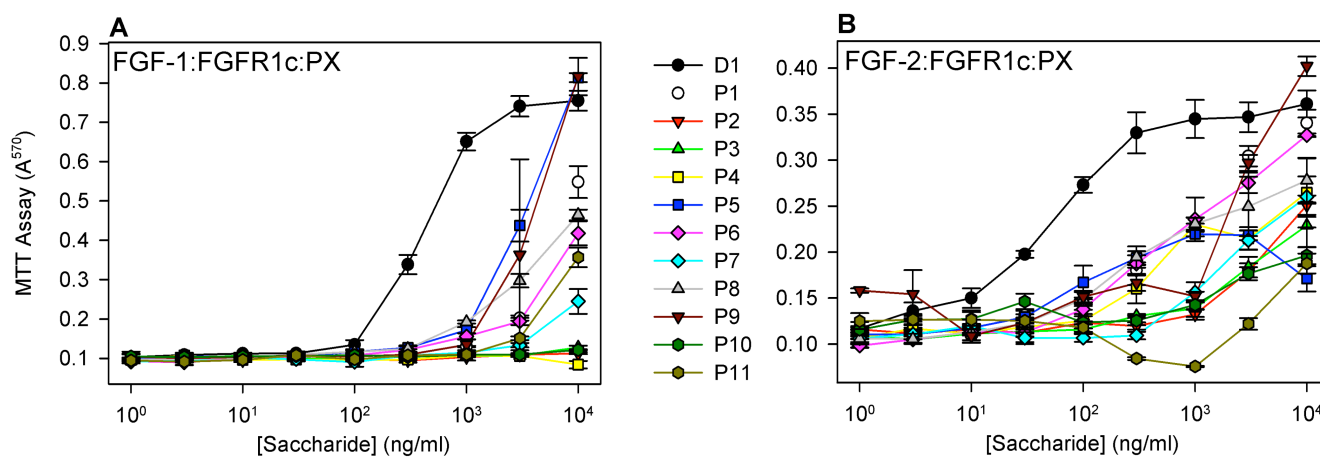

**Supplementary Figure 2** The ability of heparin chemical derivatives (DX) and sulfated plant polysaccharides (PX) to support signalling through FGFR1c/FGF-1 and -2 in a BaF3 cell assay.

Categories of activity were defined as:

**FGF-1: None-** P2, P4, P10; **low-** P7; **Medium-** P1, P6,P8,P11 and **Strong-** P5 and P9.

**FGF-2: Low-** P10, P11; **Medium-** P2,P4, P5, P7, P8, P9; **Strong-** P1 and P6.

**Supplementary Table 5 Compound key. A.** The eight modified heparin derivatives and the predominant substitution patterns of the repeating disaccharide. *I* indicates iduronate, *A* glucosamine (aminosugar) while the sub- and superscripts indicate the presence of hydroxyl (*nOH*) or *O*-sulfate at position-*n* (*nS*) and *N*-acetyl (*NAc*) or *N*-sulfate (*NS*). **B.** The starting materials from which each of the eleven chemically sulfated plant polysaccharides were prepared.

| <b>A. Heparin derivatives</b> |                                  | <b>B. Plant polysaccharides</b> |                                  |
|-------------------------------|----------------------------------|---------------------------------|----------------------------------|
| <b>Sample</b>                 | <b>Compound</b>                  | <b>Sample</b>                   | <b>Starting material</b>         |
| <b>D1</b>                     | $I_{2S}A^{6S}_{NS}$<br>(heparin) | <b>P1</b>                       | Tylose                           |
| <b>D2</b>                     | $I_{2S}A^{6S}_{NAc}$             | <b>P2</b>                       | Ethyl Cellulose                  |
| <b>D3</b>                     | $I_{2OH}A^{6S}_{NS}$             | <b>P3</b>                       | Hydroxypropylmethyl<br>Cellulose |
| <b>D4</b>                     | $I_{2S}A^{6OH}_{NS}$             | <b>P4</b>                       | Alginic Acid                     |
| <b>D5</b>                     | $I_{2OH}A^{6S}_{NAc}$            | <b>P5</b>                       | Xanthan Gum                      |
| <b>D6</b>                     | $I_{2S}A^{6OH}_{NAc}$            | <b>P6</b>                       | Locust Bean Gum                  |
| <b>D7</b>                     | $I_{2OH}A^{6OH}_{NS}$            | <b>P7</b>                       | Gum Arabic                       |
| <b>D8</b>                     | $I_{2OH}A^{6OH}_{NAc}$           | <b>P8</b>                       | Pectin                           |
| <b>D9</b>                     | $I_{2S3S}A_{6S3SNS}$             | <b>P9</b>                       | $\iota$ -Carrageenan             |
|                               |                                  | <b>P10</b>                      | Hydroxyethyl Cellulose           |
|                               |                                  | <b>P11</b>                      | Glycogen Type II                 |

**Supplementary Table 6** Degree of sulfation of sulfate polysaccharides.

| <b>Polysaccharide</b> | <b>Precursor</b>              | <b>D.O.S.# (per disaccharide)</b> |
|-----------------------|-------------------------------|-----------------------------------|
| P1                    | Tylose                        | 1.0                               |
| P2                    | Ethyl Cellulose               | 1.5                               |
| P3                    | Hydroxypropylmethyl cellulose | 2.5                               |
| P4                    | Alginic acid                  | 1.6                               |
| P5                    | Xanthan gum                   | 1.6                               |
| P6                    | Locust bean gum               | 0.9                               |
| P7                    | Gum arabic                    | 0.8                               |
| P8                    | Pectin                        | 1.3                               |
| P9                    | $\iota$ -Carrageenan          | 2.1                               |
| P10                   | Hydroxyethyl cellulose        | 2.3                               |
| P11                   | Glycogen (II)                 | 1.9                               |

# Degree of sulfation

— P5  
— P4  
— P3  
— P2  
— P1

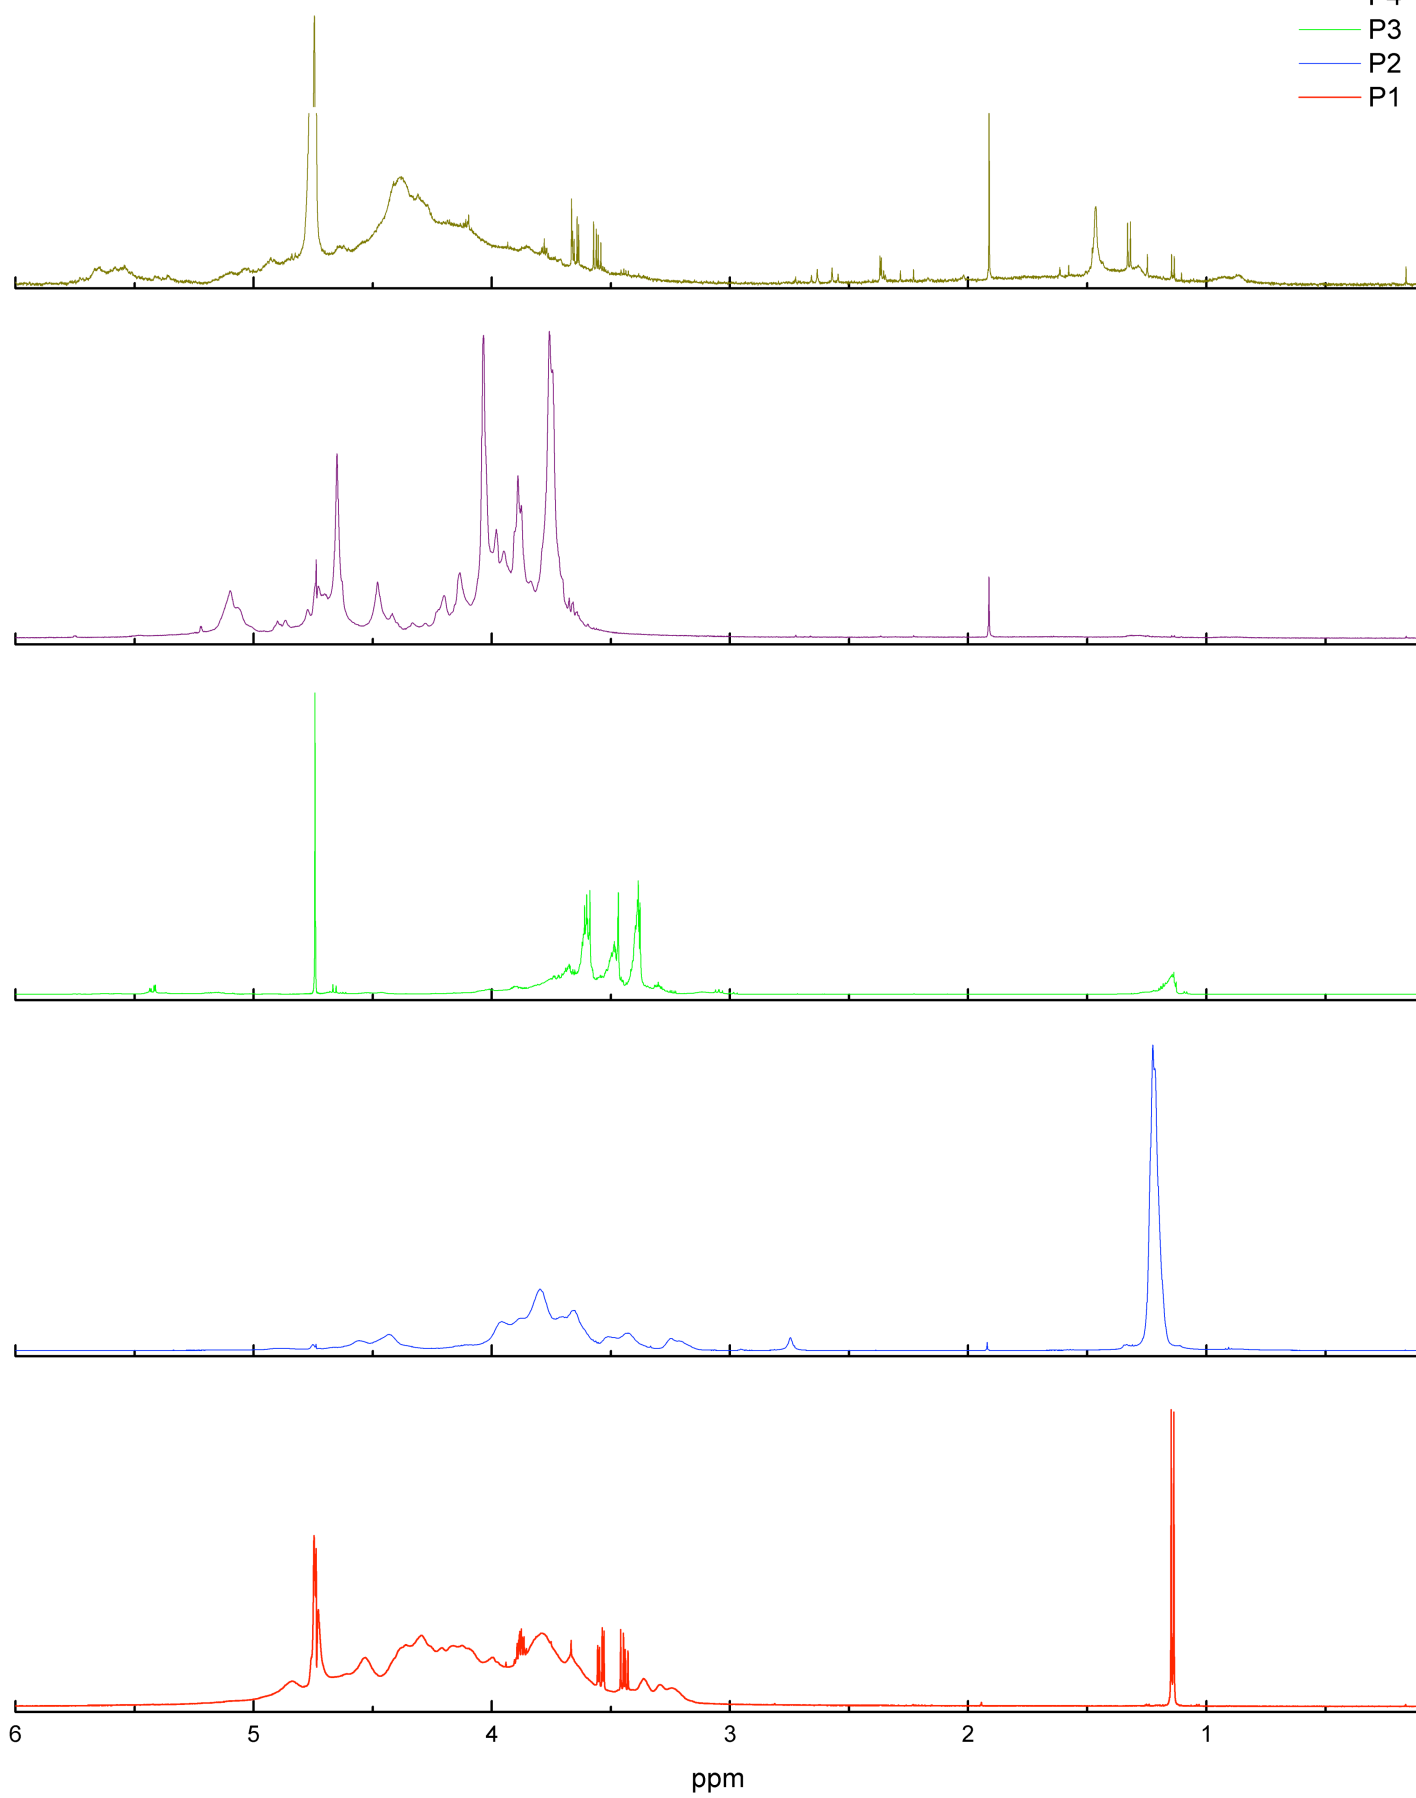

P11  
P10  
P9  
P8  
P7  
P6

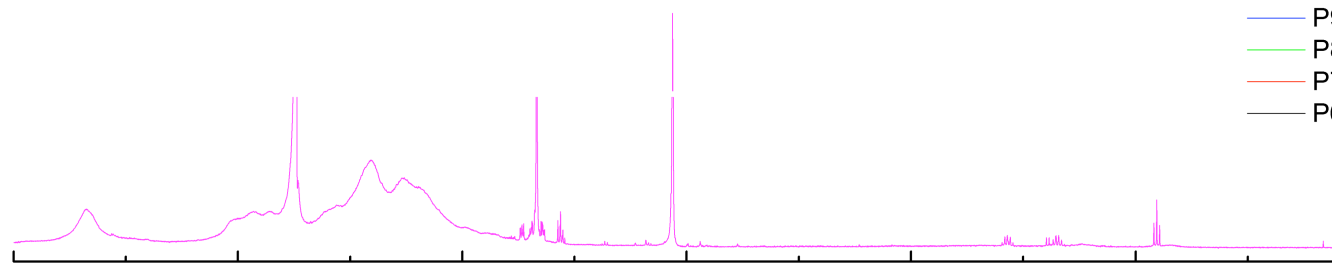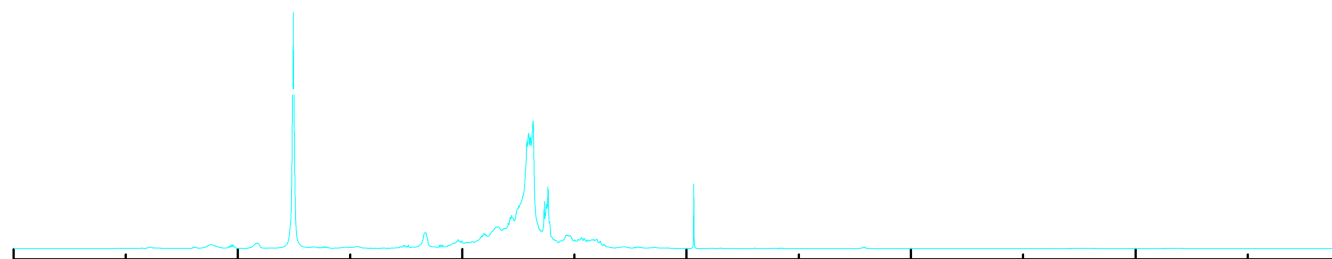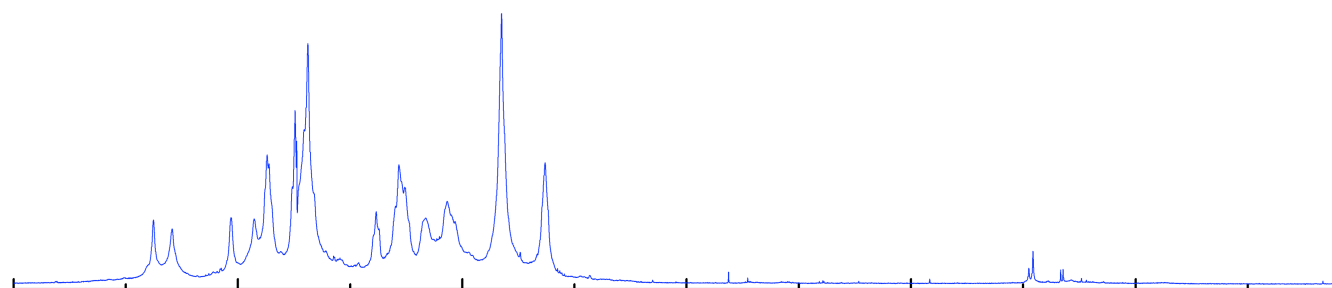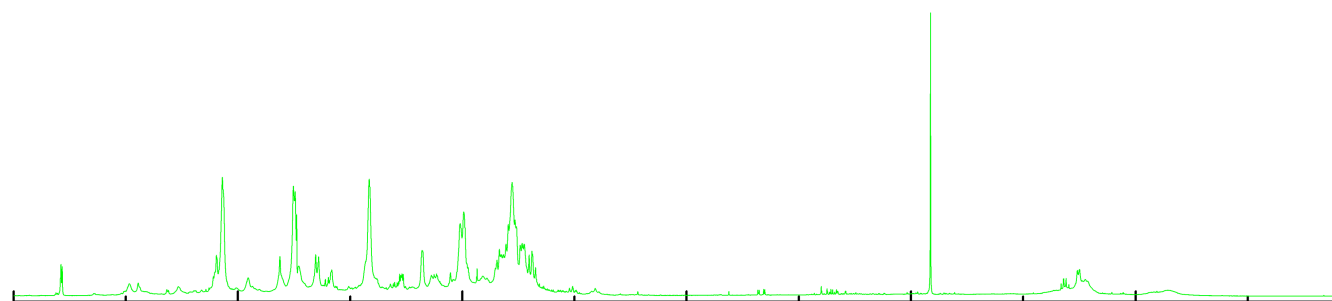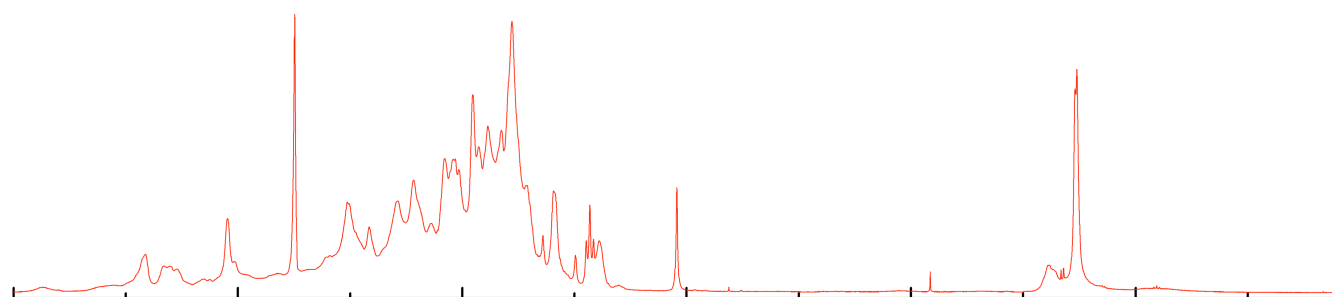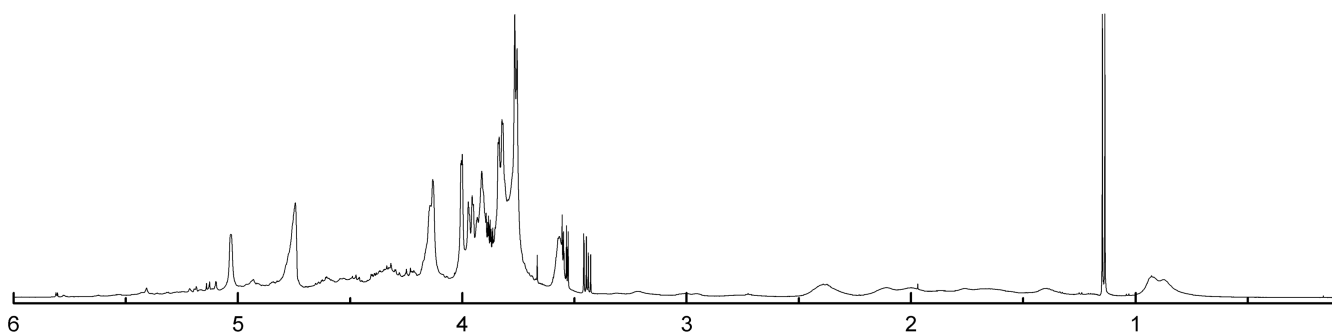

ppm



**Supplementary Figure 7**  $^1\text{H}$  NMR spectra of the chemically sulfated polysaccharides.
